# Supplementary material for: Himalayan forest waste to carbon nanotubes: a green approach using NADES template for reactive orange 16 dye adsorption
Source: Royal Society of Chemistry journal article supplement (doi:10.1039/d5re00366k), 2025-11-17
Supplement: d5re00366k1.pdf [file d5re00366k1.pdf]

## Supplementary File

### Forest waste to Carbon Nanotubes: A Green Approach using NADES template for Reactive Orange 16 Dye Adsorption

Anshika Babbar <sup>a</sup>, Priyanka Verma <sup>a</sup>, Vinay Singh <sup>a</sup>, R.S. Walia<sup>\*b</sup>, Vasundhara Singh<sup>\*a</sup>

<sup>a</sup> Department of Chemistry

<sup>b</sup> Production and Industrial Engineering Department

Punjab Engineering College (Deemed to be University), Chandigarh, India, 160012

**Table S1: Table for comparison of synthesis of CNTs**

| Reference                          | Carbon Source   | Synthesis Technique            | Synthesis Parameters                                                                    | Catalyst                | Disadvantages                                                                                                                |
|------------------------------------|-----------------|--------------------------------|-----------------------------------------------------------------------------------------|-------------------------|------------------------------------------------------------------------------------------------------------------------------|
| <i>Zhang et al.</i> <sup>[1]</sup> | Methane         | MW- assisted CVD               |                                                                                         | Nickel                  | <ul style="list-style-type: none"> <li>•Difficulty in scaling up</li> <li>•Require specialized microwave reactors</li> </ul> |
| <i>Paul et al.</i> <sup>[2]</sup>  | Coconut Oil     | CVD                            | 850°C, N <sub>2</sub> atmosphere                                                        | Fe particles            | <ul style="list-style-type: none"> <li>•High energy consumption</li> <li>•Difficulty in process optimization</li> </ul>      |
| <i>Zhu et al.</i> <sup>[3]</sup>   | Bamboo charcoal | CVD                            | 1200-1500°C at 10°C min <sup>-1</sup> , Ar atmosphere                                   | Mineral content in char | <ul style="list-style-type: none"> <li>•Variable mineral content can lead to variation in CNT quality.</li> </ul>            |
| <i>Shi et al.</i> <sup>[4]</sup>   | Gumwood         | Microwave induced pyrolysis    | 500°C, 30 - min, N <sub>2</sub> atmosphere, 2.45 GHz multimode microwave cavity         |                         | <ul style="list-style-type: none"> <li>•Low yield</li> <li>•High energy consumption</li> </ul>                               |
| <i>Wang et al.</i> <sup>[5]</sup>  | Rice Husk       | MW- Chemical vapour deposition | 2.45 GHz microwave power, 300 m Torr pressure, Ar and H <sub>2</sub> to generate plasma | Nickel                  | <ul style="list-style-type: none"> <li>•Method may result in high D/G ratio.</li> </ul>                                      |

|                                              |                                                                                |                               |                                                                            |                       |                                                                                                                                                              |
|----------------------------------------------|--------------------------------------------------------------------------------|-------------------------------|----------------------------------------------------------------------------|-----------------------|--------------------------------------------------------------------------------------------------------------------------------------------------------------|
| <i>Hamid et al.</i> <sup>[6]</sup>           | Olive oil                                                                      | Pyrolysis                     | 900°C                                                                      | NiCl <sub>2</sub>     | <ul style="list-style-type: none"> <li>• High temperature requirement.</li> <li>• High economic barriers</li> </ul>                                          |
| <i>Fathy et al.</i> <sup>[7]</sup>           | Rice Straw                                                                     | Conventional CVD              | 800°C                                                                      | Ferrocene and Nickel  | <ul style="list-style-type: none"> <li>• Complex Pre-treatment processing.</li> <li>• Risk of catalyst contamination.</li> <li>• High temperature</li> </ul> |
| <i>Debalina et al.</i> <sup>[8]</sup>        | Sugarcane bagasse                                                              | MW pyrolysis                  | 600 W, 500°C                                                               | Fe and Co             | <ul style="list-style-type: none"> <li>• Difficulty in maintaining process parameters.</li> <li>• Difficulty in catalyst integration.</li> </ul>             |
| <i>Zhang et al.</i> <sup>[9]</sup>           | Pine nutshell                                                                  | MW-Chemical vapour deposition | 600°C, N <sub>2</sub> , Power: 2kW, 60 min                                 | Nickel                | <ul style="list-style-type: none"> <li>• Challenges in scaling up.</li> <li>• Plasma instability leads to defective product formation.</li> </ul>            |
| <i>Omoriyekomwan et al.</i> <sup>[10]</sup>  | Palm kernel shell cellulose                                                    | MW pyrolysis                  | Power output: - 2000W, Frequency: 2.45 GHz, 600°C, N <sub>2</sub> , 60 min |                       | <ul style="list-style-type: none"> <li>• High energy consumption</li> </ul>                                                                                  |
| <i>Hildago-Oporto et al.</i> <sup>[11]</sup> | Biochar from waste of wheat straw, oat hulls, rapeseed cake and hazelnut hulls | Microwave Irradiation         | 600°C, Frequency: 2.45 GHz, Power: 200 W                                   | Ferrocene             | <ul style="list-style-type: none"> <li>• Low CNT quality and structural defects.</li> </ul>                                                                  |
| <i>Roquia et al.</i> <sup>[12]</sup>         | <i>Juglans regia</i> (walnut) shells                                           | Pyrolysis                     | 700°C, 4 h, Ar gas                                                         | Ferrocene and Benzene | <ul style="list-style-type: none"> <li>• Use of harmful catalysts.</li> <li>• Scale-up challenges.</li> </ul>                                                |
| <i>Le et al.</i> <sup>[13]</sup>             | Eucalyptus oil                                                                 | Pyrolysis                     | 800-900°C, 30 min, N <sub>2</sub> gas                                      | Ferrocene             | <ul style="list-style-type: none"> <li>• High temperature requirement.</li> <li>• Yield and purity challenges.</li> </ul>                                    |

MW: Microwave; CVD: Chemical Vapor Deposition

**Table S2: Composition of various NADES used**

| Sr. No. | Hydrogen Acceptor | Bond     | Hydrogen Bond Donor | Molar Ratio | Results      |
|---------|-------------------|----------|---------------------|-------------|--------------|
| 1.      | Choline (ChCl)    | Chloride | Oxalic Acid         | 1 : 1       | Successful   |
| 2.      | ChCl              |          | Hydroquinone        | 1 : 1       | Unsuccessful |
| 3.      | ChCl              |          | Glucose             | 4 : 1       | Unsuccessful |
| 4.      | ChCl              |          | Citric Acid         | 1 : 1       | Unsuccessful |
| 5.      | ChCl              |          | Lactic acid         | 1 : 1       | Unsuccessful |
| 6.      | ChCl              |          | Oxalic Acid         | 1 : 2       | Unsuccessful |
| 7.      | ChCl              |          | Oxalic Acid         | 1 : 3       | Unsuccessful |

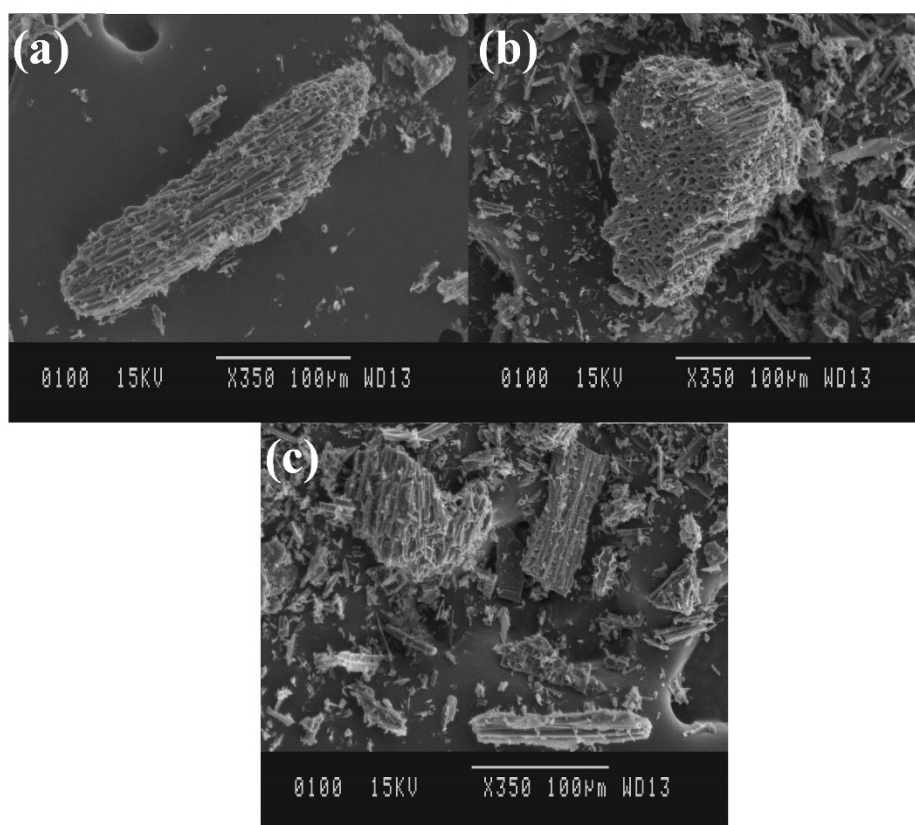**Fig. S1. SEM images of carbon materials synthesized at (a) 1 h (b) 3 h (c) 8 h**

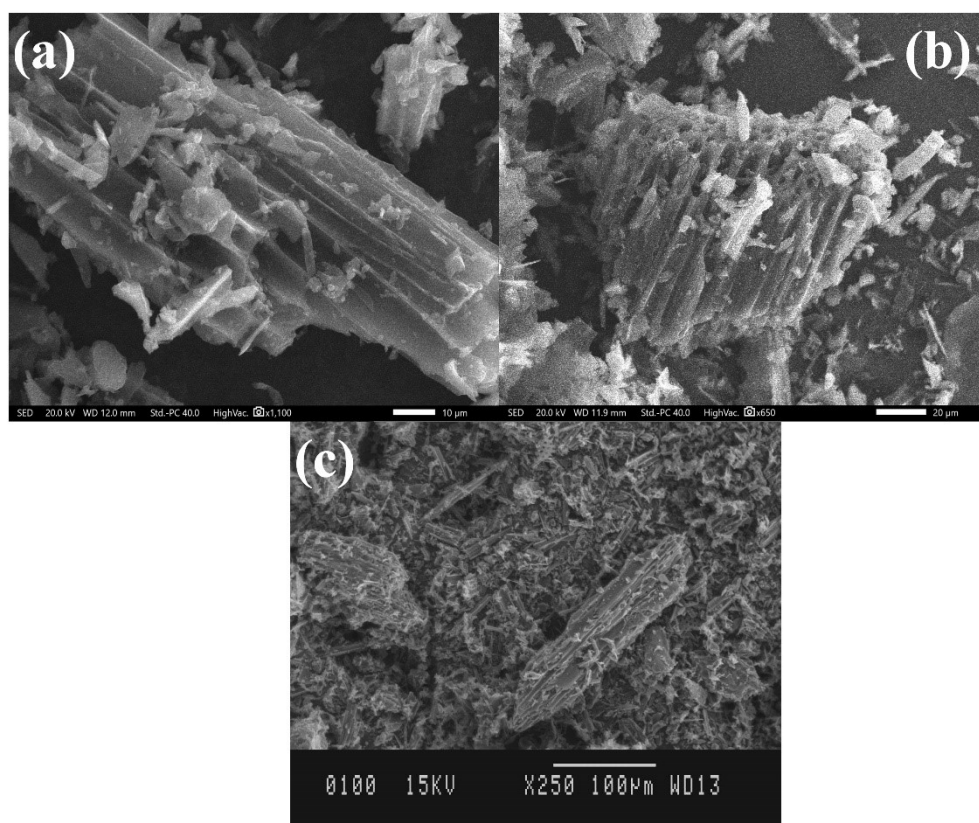

**Fig. S2. SEM images of carbon materials synthesized with different molar ratios of [ChCl]/Oxalic acid/NADES (a) 1 : 2 (b) 1 : 3 (c) 2 : 1**

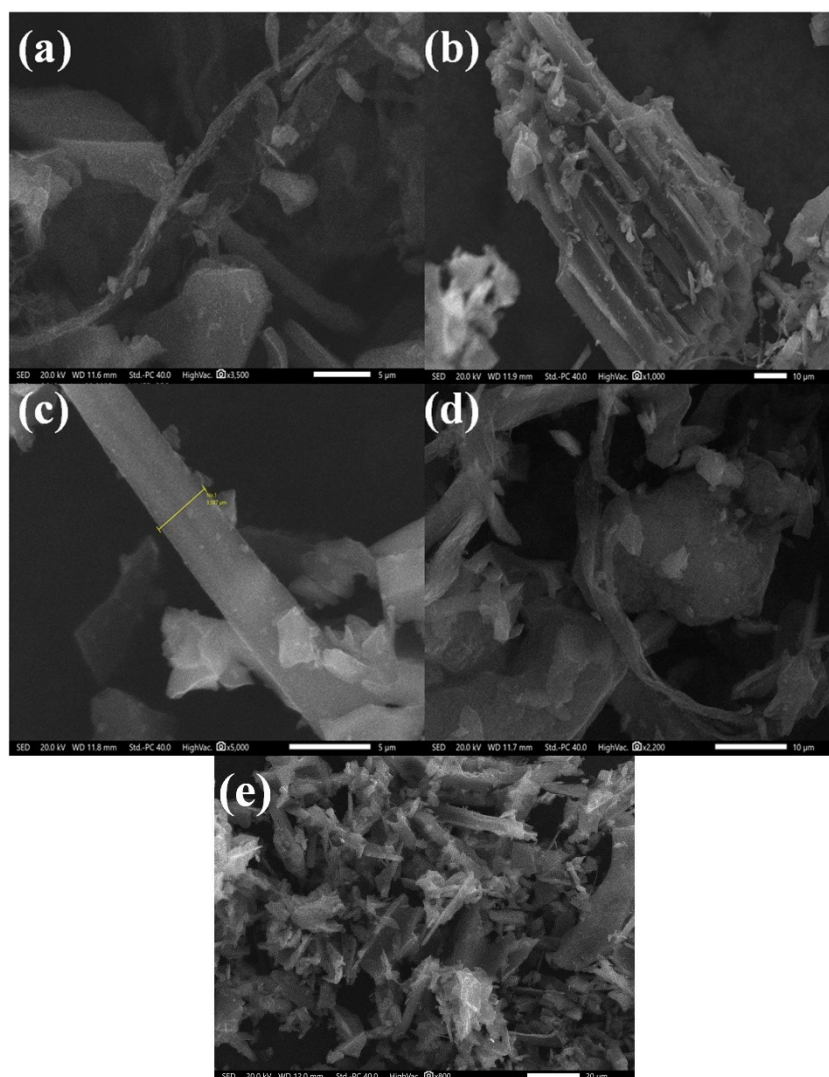

**Fig. S3. SEM images of carbon materials synthesized with different NADES (a) [ChCl/Glucose] (b) [ChCl/Citric acid] (c) [ChCl/Hq] (d) [ChCl/Lactic acid] (e) Without using NADES**

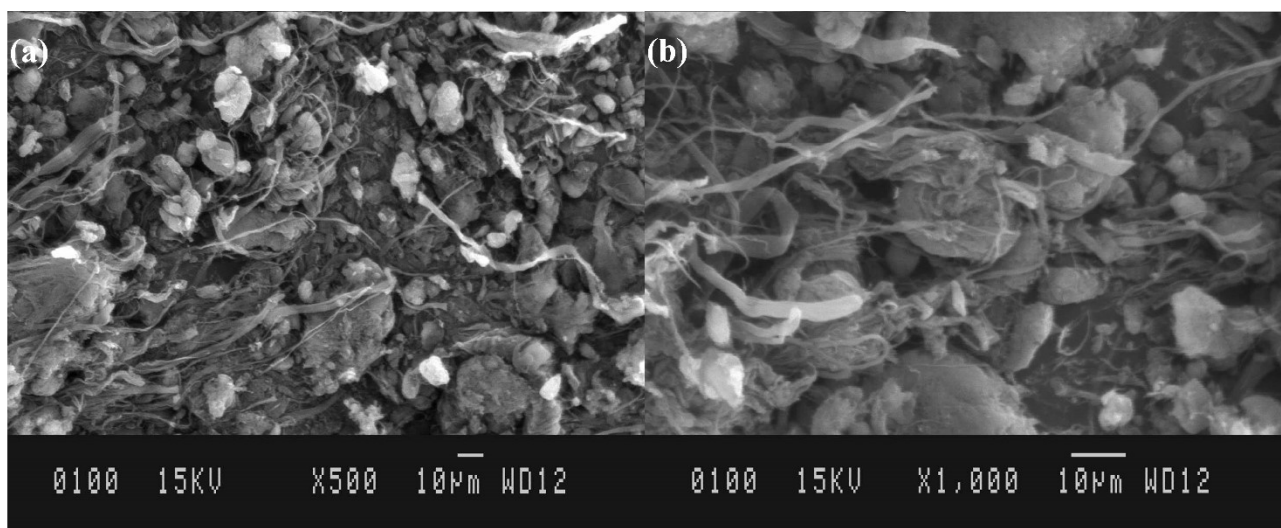

**Fig. S4. SEM images of CNT synthesized using [ChCl/Oxalic acid] NADES (experiment performed in duplicate)**

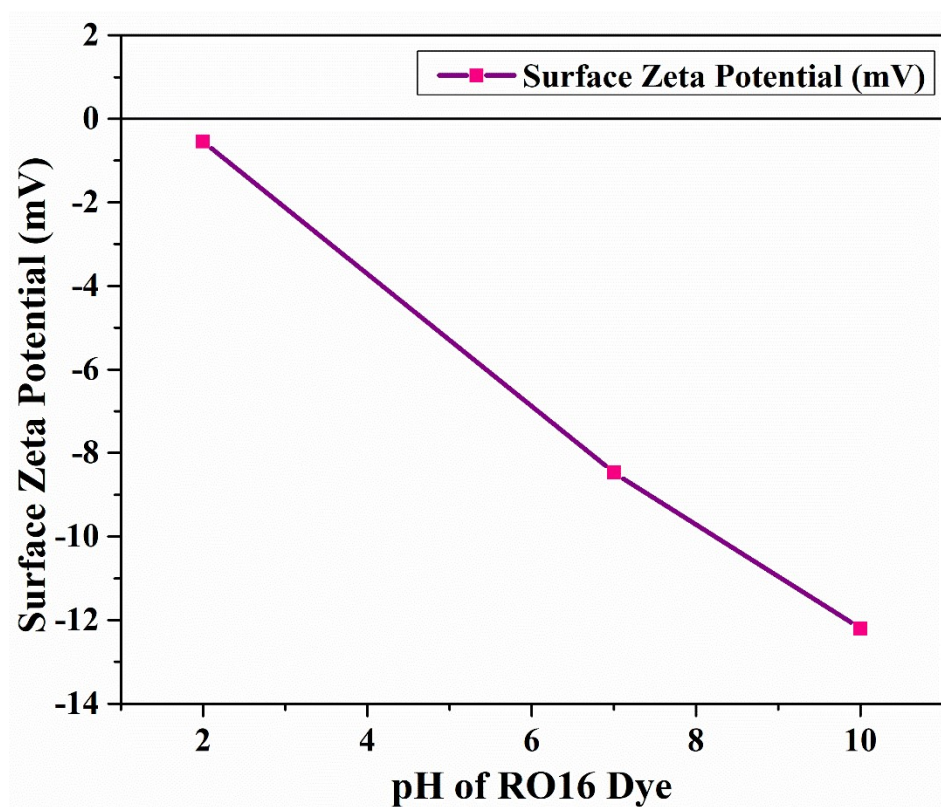

**Fig. S5. Surface Zeta Potential of RO16 Dye at pH 2, 7 and 10.**



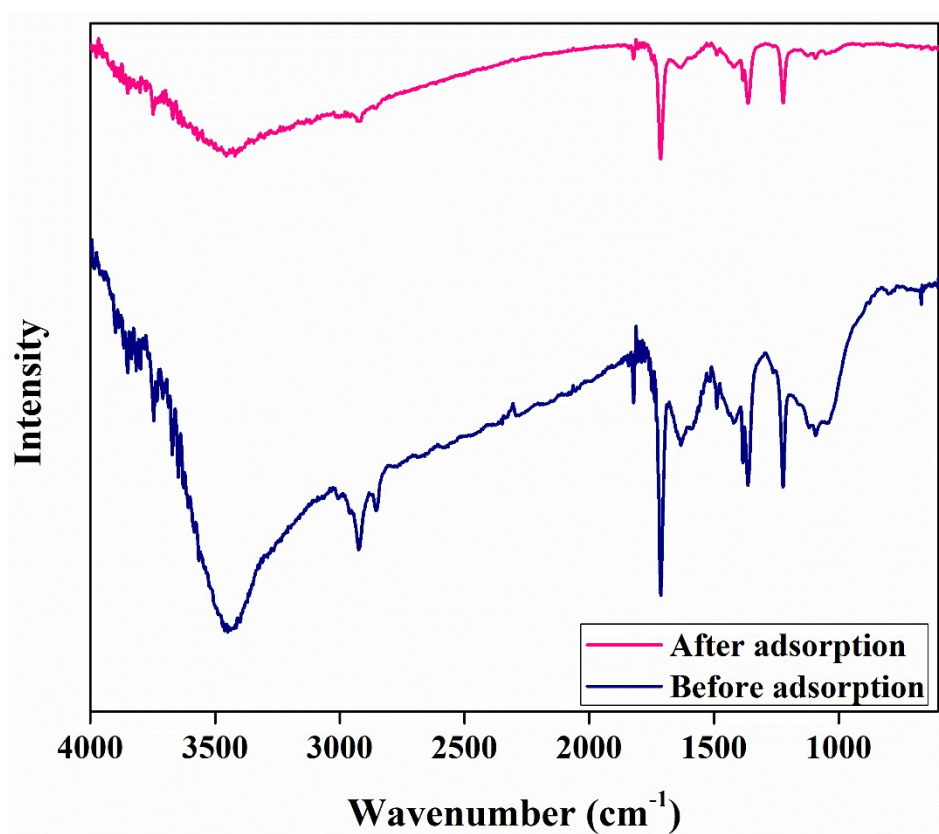

**Fig. S6. FTIR of adsorbent before and after adsorption**

#### References:

1. Zhang, J., Tahmasebi, A., Omoriyekomwan, J. E., & Yu, J. (2019). Production of carbon nanotubes on bio-char at low temperature via microwave-assisted CVD using Ni catalyst. *Diamond and Related Materials*, 91, 98-106.
2. Paul, S., & Samdarshi, S. K. (2011). A green precursor for carbon nanotube synthesis. *New Carbon Materials*, 26(2), 85-88.
3. Zhu, J., Jia, J., Kwong, F. L., Ng, D. H. L., & Tjong, S. C. (2012). Synthesis of multiwalled carbon nanotubes from bamboo charcoal and the roles of minerals on their growth. *biomass and bioenergy*, 36, 12-19.
4. Shi, K., Yan, J., Lester, E., & Wu, T. (2014). Catalyst-free synthesis of multiwalled carbon nanotubes via microwave-induced processing of biomass. *Industrial & Engineering Chemistry Research*, 53(39), 15012-15019.

5. Wang, Z., Ogata, H., Morimoto, S., Ortiz-Medina, J., Fujishige, M., Takeuchi, K., ... & Endo, M. (2015). Nanocarbons from rice husk by microwave plasma irradiation: From graphene and carbon nanotubes to graphenated carbon nanotube hybrids. *Carbon*, 94, 479-484.
6. Hamid, Z. A., Azim, A. A., Mouez, F. A., & Rehim, S. A. (2017). Challenges on synthesis of carbon nanotubes from environmentally friendly green oil using pyrolysis technique. *Journal of Analytical and Applied Pyrolysis*, 126, 218-229.
7. Fathy, N. A. (2017). Carbon nanotubes synthesis using carbonization of pretreated rice straw through chemical vapor deposition of camphor. *RSC advances*, 7(45), 28535-28541.
8. Debalina, B., Reddy, R. B., & Vinu, R. (2017). Production of carbon nanostructures in biochar, bio-oil and gases from bagasse via microwave assisted pyrolysis using Fe and Co as susceptors. *Journal of Analytical and Applied Pyrolysis*, 124, 310-318.
9. Zhang, J., Tahmasebi, A., Omoriyekomwan, J. E., & Yu, J. (2019). Production of carbon nanotubes on bio-char at low temperature via microwave-assisted CVD using Ni catalyst. *Diamond and Related Materials*, 91, 98-106.
10. Omoriyekomwan, J. E., Tahmasebi, A., Zhang, J., & Yu, J. (2019). Mechanistic study on direct synthesis of carbon nanotubes from cellulose by means of microwave pyrolysis. *Energy Conversion and Management*, 192, 88-99.
11. Hidalgo, P., Navia, R., Hunter, R., Coronado, G., & Gonzalez, M. (2019). Synthesis of carbon nanotubes using biochar as precursor material under microwave irradiation. *Journal of environmental management*, 244, 83-91.
12. Roquia, A., khalfan hamed Alhashmi, A., & hamed Abdullah alhasmi, B. (2021). Synthesis and characterisation of carbon nanotubes from waste of Juglans regia (walnut) shells. *Fullerenes, Nanotubes and Carbon Nanostructures*, 29(11), 860-867.



13. Le, G. T., Mala, P., Ratchahat, S., & Charinpanitkul, T. (2021). Bio-based production of carbon nanotubes via co-pyrolysis of eucalyptus oil and ferrocene. *Journal of Analytical and Applied Pyrolysis*, 158, 105257.
